# Supplementary material for: Temperature gradient reduction in a tubular direct ammonia solid oxide fuel cell by fluidizing the cathode particles
Source: Royal Society of Chemistry journal article supplement (doi:10.1039/d3se01168b), 2024-01-01
Supplement: d3se01168b1.pdf [file d3se01168b1.pdf]

# Temperature Gradient Reduction in a Tubular Direct Ammonia Solid Oxide Fuel Cell by Fluidizing the Cathode Particles

Yu Qiu<sup>a</sup>, Yanxin Yang<sup>a</sup>, Enkang Fu<sup>a</sup>, Rui Xiao<sup>a,\*</sup>

a. Key Laboratory of Energy Thermal conversion and control of Ministry of Education, School of Energy and Environment, Southeast University, Nanjing 210096, PR China

Email: [ruixiao@seu.edu.cn](mailto:ruixiao@seu.edu.cn)

## Supporting materials

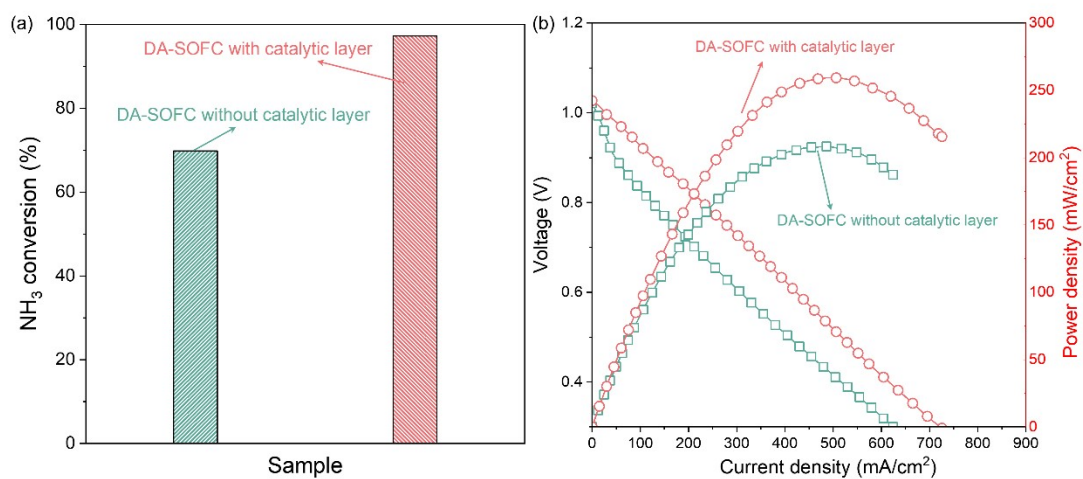

**Fig. S1.** (a) NH<sub>3</sub> decomposition and (b) *I-V-P* profiles of DA-SOFC with and without catalytic layer.

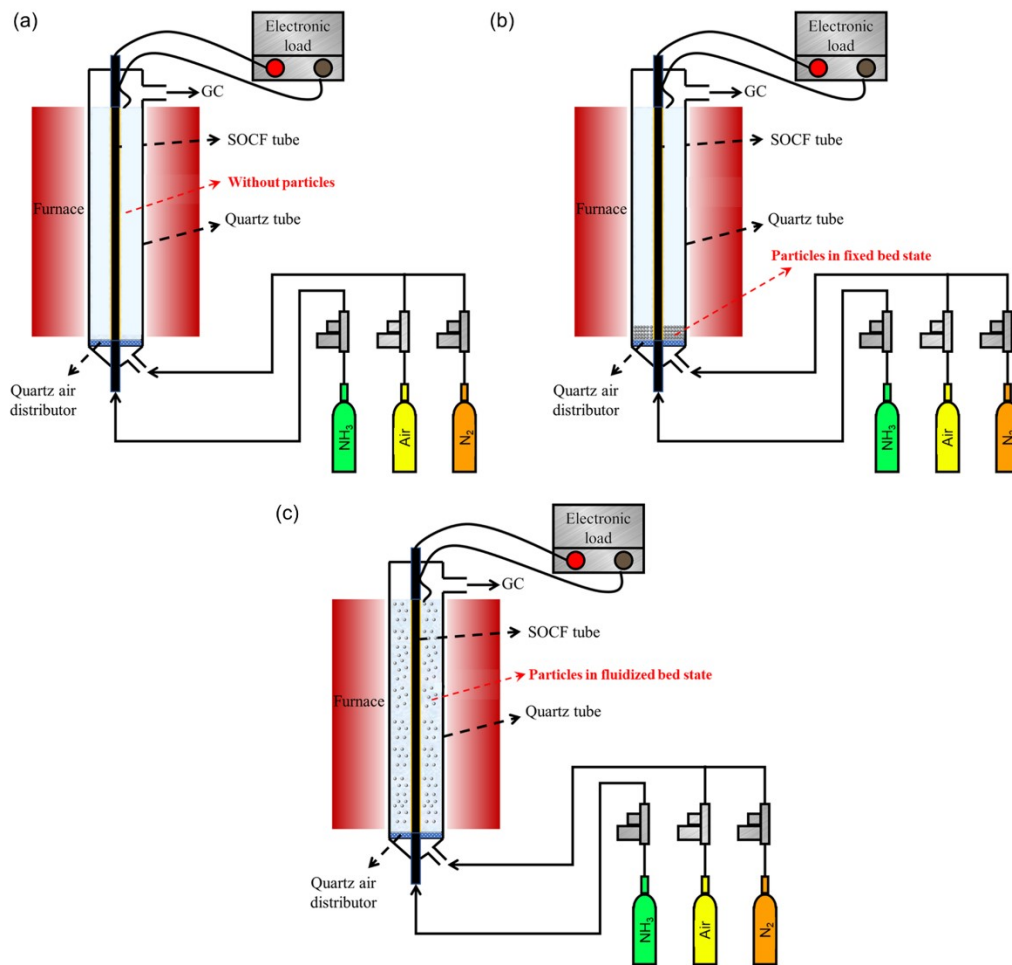

**Fig. S2.** Schematic illustration of the three configurations. (a) DA-SOFC/N, (b) DA-SOFC/FB, and (c) DA-SOFC/FL

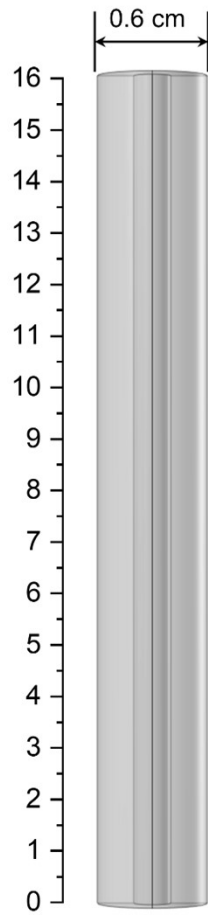

**Fig. S3.** Schematic of the numerical model.

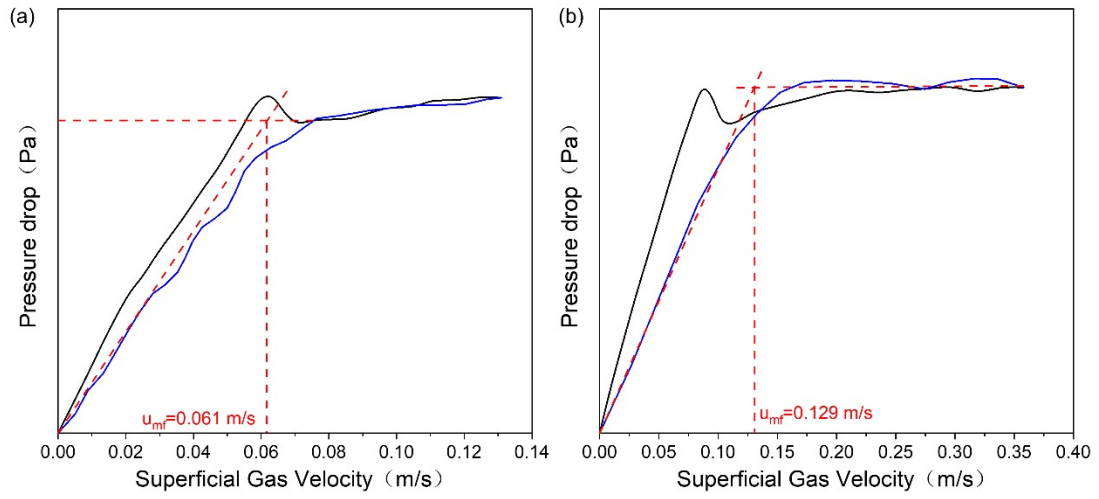

**Fig. S4.** Pressure drops versus superficial velocity for the particles with the size of (a) 242  $\mu\text{m}$  and (b) 350  $\mu\text{m}$  to determine the critical fluidized velocity ( $u_{mf}$ ).

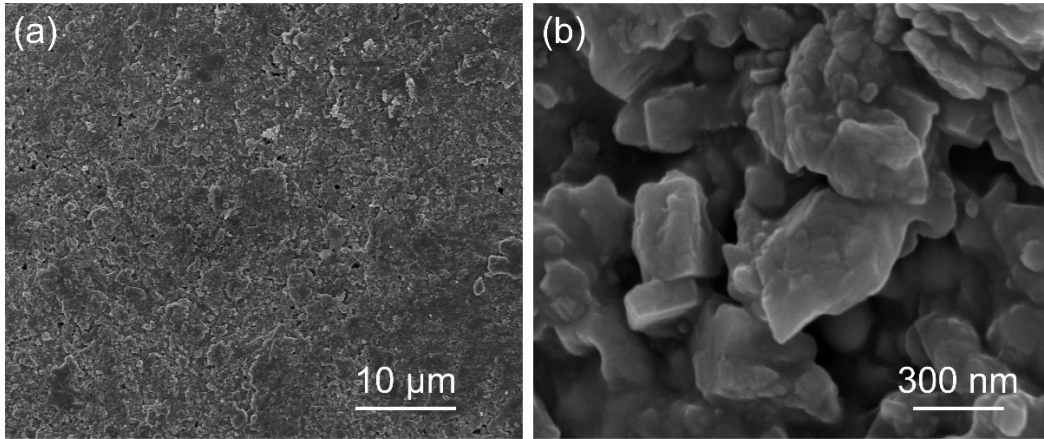

**Fig. S5.** SEM images of the cathode layer for DA-SOFC/FL after 200 hours

**Table S1. Configuration of the tubular SOFC**

| Layers      | Composition | Thickness<br>( $\mu\text{m}$ ) | Diameter<br>(mm) | Elastic<br>modulus<br>(GPa) | Thermal<br>expansion<br>coefficient ( $/^{\circ}\text{C}$ ) |
|-------------|-------------|--------------------------------|------------------|-----------------------------|-------------------------------------------------------------|
| Anode       | Ni/YSZ      | 620                            | 6                | 200                         | $11.5 \cdot 10^{-6}$                                        |
| Electrolyte | YSZ         | 5.91                           | 6                | 200                         | $10.0 \cdot 10^{-6}$                                        |
| Cathode     | LSCF/YSZ    | 8.38                           | 6                | 95                          | $17.0 \cdot 10^{-6}$                                        |

**Table S2.** Parameters of the DA-SOFC used in the modelling

| Parameter                        | Dimension                     |
|----------------------------------|-------------------------------|
| Inner diameter                   | 6 mm                          |
| Anode thickness                  | 620 $\mu\text{m}$             |
| Electrolyte thickness            | 5.9 $\mu\text{m}$             |
| Cathode thickness                | 8.4 $\mu\text{m}$             |
| Cell length                      | 16 cm                         |
| Anode permeability               | 1e-10 $\text{m}^2$            |
| Cathode permeability             | 1e-10 $\text{m}^2$            |
| Temperature                      | 750 $^{\circ}\text{C}$        |
| Anode thermal conductivity       | 11 (W/m/K)                    |
| Electrolyte thermal conductivity | 2.7 (W/m/K)                   |
| Cathode thermal conductivity     | 6 (W/m/K)                     |
| Anode specific heat              | 450 (J/kg/K)                  |
| Electrolyte specific heat        | 470 (J/kg/K)                  |
| Cathode specific heat            | 430 (J/kg/K)                  |
| Porosity                         | 0.35                          |
| Anode inlet composition          | Pure Ammonia                  |
| Anode inlet composition          | Air                           |
| Reference diffusivity            | 3.16e-8 $\text{m}^2/\text{s}$ |
